# Supplementary material
Source: publisher figshare collection journal article supplement (https://tandf.figshare.com/articles/dataset/_/825577)
Supplement: Supplementary file 1 [file 1]

Supplementary Table. List of observed species and taxa from Hardangerfjord. Relative abundances are given as the number of field sequences with occurrence of the different species and *N*, the number of individuals and colonies. X indicates presence without attempts to count. Depth is given as mean with range in parentheses. Indet. = not identified to lower systematic levels.

| Taxa                                                   | Field sequences | <i>N</i><br>(ind & col) | Depth         |
|--------------------------------------------------------|-----------------|-------------------------|---------------|
| Algae                                                  |                 |                         |               |
| <i>Lithothamnium</i> sp.                               | 1               | 121                     | 52 (50-54)    |
| Foraminifera                                           |                 |                         |               |
| <i>Rhabdammina</i> sp.                                 | 14              | X                       | 299 (131-417) |
| Foraminifera indet.                                    | 5               |                         | 326 (287-346) |
| Foraminifera indet. sand test                          | 8               | X                       | 284 (132-403) |
| Foraminifera indet. calcareous                         | 34              | X                       | 286 (148-427) |
| Foraminifera indet. yellow                             | 44              |                         | 298 (88-426)  |
| <i>Pelosina arborescens</i>                            | 13              | X                       | 300 (115-417) |
| Porifera                                               |                 |                         |               |
| <i>Antho dichotoma</i>                                 | 26              | 148                     | 198 (124-352) |
| <i>Aplysilla sulfurea</i>                              | 5               | 23                      | 206 (133-323) |
| <i>Asbestopluma pennatula</i>                          | 1               | 1                       | 215           |
| <i>Axinella infundibuliformis</i>                      | 78              | 35                      | 188 (50-416)  |
| Axinellidae indet.                                     |                 | 2172                    | 187 (50-364)  |
| <i>Craniella zetlandica</i>                            | 2               |                         | 139           |
| <i>Geodia atlantica</i>                                | 1               |                         | 127           |
| <i>Geodia baretti</i>                                  | 1               |                         | 199           |
| <i>Geodia</i> spp.                                     | 10              | 94                      | 170 (132-359) |
| <i>Geodia macandrewi</i>                               | 1               |                         | 202           |
| <i>Mycale lingua</i>                                   | 28              | 491                     | 200 (85-347)  |
| <i>Phakellia ventilabrum</i>                           | 104             | 27                      | 233 (81-410)  |
| Polymastidae indet.                                    |                 | 9                       | 223 (147-402) |
| Porifera indet. encrusting                             | 31              | X                       | 243 (105-410) |
| Porifera encrusting (cf. <i>Hymedesmia paupertas</i> ) | 65              | X                       | 214 (79-383)  |
| Porifera indet. branched                               | 8               | 1                       | 218 (124-395) |
| Porifera indet. large                                  | 1               | 41                      | 321           |
| Porifera indet. large white                            | 1               | 44                      | 222 (133-320) |
| Porifera indet. round hairy                            | 7               |                         | 249 (172-338) |
| Porifera indet. small                                  | 5               | 189                     | 211 (133-357) |
| Porifera indet. small white                            | 2               | X                       | 175 (132-350) |
| Porifera indet. small yellow                           | 2               | 26                      | 244 (206-343) |
| Porifera indet. small round yellow                     | 1               | 58                      | 327 (206-402) |
| Porifera indet. small round brown                      |                 | 60                      | 347 (330-357) |
| Porifera indet.                                        | 84              | 75                      | 266 (80-421)  |
| Porifera indet. white                                  | 2               | X                       | 223 (99-402)  |
| Porifera indet. yellow                                 | 8               |                         | 267 (134-421) |
| <i>Thetya</i> sp.                                      |                 | 22                      | 136 (135-138) |
| <i>Stelletta grubei</i>                                | 7               |                         | 332 (278-390) |
| <i>Stryphnus phlaeagraei</i>                           | 1               | 1                       | 322           |
| <i>Stylocordyla borealis</i>                           | 28              |                         | 325 (119-414) |

| Taxa                                  | Field<br>sequences | N<br>(ind & col) | Depth         |
|---------------------------------------|--------------------|------------------|---------------|
| Cnidaria                              |                    |                  |               |
| Anthozoa indet.                       | 1                  |                  | 169           |
| Octocorallia indet.                   | 3                  | 61               | 171 (134-214) |
| Hydrozoa                              |                    |                  |               |
| <i>Corymorpha nutans</i>              | 22                 | 3                | 244 (105-364) |
| Hydrozoa indet.                       | 13                 | 14               | 212 (87-456)  |
| Hydrozoa cf. <i>Kirchenpaueria</i>    |                    | 20               | 280 (239-402) |
| Stylasteridae indet.                  | 1                  |                  | 206           |
| Actiniaria                            |                    |                  |               |
| Actiniaria indet.                     | 29                 | 211              | 251 (80-404)  |
| <i>Actinostola</i> cf. <i>callosa</i> | 1                  | 1                | 401           |
| <i>Adamsia palliata</i>               | 1                  |                  | 124           |
| <i>Bolocera tuediae</i>               | 18                 | 11               | 231 (86-403)  |
| Cerianthidae indet.                   | 47                 | 1436             | 330 (134-457) |
| Hormatidae indet.                     | 1                  |                  | 320           |
| <i>Prothanthea simplex</i>            |                    | 349              | 250 (200-386) |
| Zoanthidae indet.                     | 2                  |                  | 169 (134-204) |
| Alcyonacea                            |                    |                  |               |
| <i>Anthomastus grandiflorus</i>       | 7                  |                  | 371 (339-418) |
| Gorgonacea                            |                    |                  |               |
| <i>Clavularia borealis</i>            | 1                  |                  | 140           |
| Gorgonacea indet.                     | 7                  | 2                | 270 (214-339) |
| <i>Isidella lofotensis</i>            | 33                 | 192              | 344 (243-437) |
| <i>Paragorgia arborea</i>             | 16                 | 27               | 245 (132-438) |
| <i>Paramuricea placomus</i>           | 12                 | 37               | 206 (135-340) |
| <i>Swiftia pallida</i>                | 1                  | 4                | 294 (214-320) |
| Pennatulacea                          |                    |                  |               |
| <i>Funiculina quadrangularis</i>      | 54                 | 480              | 199 (56-430)  |
| <i>Halipteris finmarchia</i>          | 1                  | 1                | 217           |
| <i>Kophobelemnion stelliferum</i>     | 37                 | 296              | 291 (183-436) |
| <i>Pennatula phosphorea</i>           | 10                 | 51               | 150 (51-333)  |
| Pennatulacea indet.                   | 25                 | 11               | 263 (131-408) |
| <i>Virgularia mirabilis</i>           | 30                 | 882              | 226 (50-404)  |
| Scleractinia                          |                    |                  |               |
| <i>Lophelia pertusa</i>               | 11                 | 7                | 201 (136-240) |
| Nemertea                              |                    |                  |               |
| Nemertea indet.                       | 6                  | 7                | 207 (138-221) |
| Polychaeta                            |                    |                  |               |
| Aphroditoidea indet.                  |                    | 1                | 226           |
| <i>Chaetopterus</i> sp.               | 12                 |                  | 217 (130-368) |
| <i>Ditrupa arietina</i>               | 1                  |                  | 385           |
| <i>Eunice</i> sp.                     | 1                  |                  | 146           |
| <i>Filograna implexa</i>              | 3                  |                  | 86 (78-94)    |
| Polychaeta indet.                     | 8                  |                  | 215 (127-323) |

| Taxa                                  | Field<br>sequences | N<br>(ind & col) | Depth         |
|---------------------------------------|--------------------|------------------|---------------|
| Polychaeta errantia indet.            | 2                  | 9                | 222 (214-267) |
| Polychaeta indet. sand tube           | 1                  |                  | 88            |
| Polychaeta indet. tube                |                    | 124              | 222 (146-284) |
| Polynoidae indet.                     | 4                  |                  | 302 (225-417) |
| <i>Pomatoceros triqueter</i>          | 1                  |                  | 130           |
| <i>Sabella penicillus</i>             | 9                  | 6                | 194 (87-334)  |
| Sabellidae indet.                     | 1                  | 5                | 201 (118-220) |
| Serpulidae indet.                     | 8                  | 4                | 229 (132-385) |
| Terebellidae indet.                   |                    | 1                | 320           |
| Brachiopoda                           |                    |                  |               |
| Brachiopoda indet.                    | 5                  | 26               | 151 (87-215)  |
| <i>Novocrania anomala</i>             | 4                  | 3                | 302 (131-403) |
| <i>Terebratulina retusa</i>           |                    | 1                | 402           |
| Bryozoa                               |                    |                  |               |
| Bryozoa indet.                        | 3                  |                  | 243 (87-321)  |
| Bryozoa branched                      | 3                  | 1                | 245 (105-320) |
| Bryozoa encrusting                    | 1                  |                  | 130           |
| Crisidae indet.                       | 1                  |                  | 134           |
| Dendrochirotea indet.                 |                    | 1                | 210           |
| <i>Hornera</i> cf. <i>lichenoides</i> | 4                  |                  | 136 (131-140) |
| <i>Reteporella beaniana</i>           | 4                  | 9                | 169 (134-320) |
| Echiura                               |                    |                  |               |
| <i>Bonellia viridis</i>               | 24                 | 41               | 258 (131-420) |
| Mollusca                              |                    |                  |               |
| Polyplacophora indet.                 |                    |                  |               |
| Chitonida indet.                      | 1                  | 1                | 133           |
| Bivalvia                              |                    |                  |               |
| <i>Acesta excavata</i>                | 27                 | 395              | 263 (175-378) |
| Anomidae indet.                       | 1                  | 3                | 209 (284-284) |
| <i>Astarte</i> sp.                    |                    | 1                | 320           |
| Bivalvia indet.                       | 3                  |                  | 158 (99-253)  |
| <i>Chlamys</i> sp.                    | 3                  |                  | 157 (133-204) |
| <i>Pseudamussium pelustrae</i>        | 1                  |                  | 135           |
| Gastropoda                            |                    |                  |               |
| Prosobranchia indet.                  | 4                  | 1                | 234 (134-370) |
| <i>Calliostoma</i> sp.                | 1                  |                  | 134           |
| Cephalopoda                           |                    |                  |               |
| Octopoda indet.                       | 7                  | 1                | 273 (170-332) |
| Crustacea                             |                    |                  |               |
| Cirripedia                            |                    |                  |               |
| Cirripedia indet.                     | 1                  |                  | 215           |
| Scalpellidae indet.                   | 1                  |                  | 320           |
| Amphipoda                             |                    |                  |               |
| Amphipoda indet.                      | 1                  | 7                | 195 (146-343) |

| Taxa                                | Field<br>sequences | N<br>(ind & col) | Depth         |
|-------------------------------------|--------------------|------------------|---------------|
| Amphipoda on hydrozoan              | 1                  |                  | 147           |
| Amphipoda on <i>Isidella</i>        | 2                  |                  | 305 (266-345) |
| Amphipoda red                       | 1                  |                  | 386           |
| Amphipoda white                     | 2                  |                  | 363 (340-386) |
| Isopoda                             |                    |                  |               |
| Isopoda indet.                      |                    | 1                | 206           |
| Munnopsidae indet.                  | 1                  | 1                | 266           |
| Decapoda                            |                    |                  |               |
| Brachyura indet.                    | 2                  |                  | 311 (306-315) |
| <i>Calocaris macandreae</i>         | 2                  | 1                | 306 (192-345) |
| Caridea indet.                      |                    | 196              | 311 (116-402) |
| Crangonidae indet.                  | 14                 | 1                | 339 (126-413) |
| Galatheidae indet.                  |                    | 2                | 324 (311-336) |
| <i>Lithodes maja</i>                | 13                 | 9                | 191 (124-370) |
| <i>Munida</i> sp.                   | 182                | 5646             | 255 (86-427)  |
| <i>Munidopsis serricornis</i>       | 1                  | 18               | 147 (146-147) |
| Paguridae indet.                    | 21                 | 8                | 231 (87-403)  |
| <i>Nephrops norvegicus</i>          | 19                 | 7                | 213 (130-334) |
| Pandalidae indet.                   | 111                |                  | 277 (87-447)  |
| <i>Pandalus propinquus</i>          | 1                  | 1                | 146           |
| "Scaphopoda crustacean"             | 3                  |                  | 131 (78-215)  |
| Echinodemata                        |                    |                  |               |
| Crinoidea                           |                    |                  |               |
| Crinoidea indet.                    | 2                  |                  | 212 (87-337)  |
| Asteroidea                          |                    |                  |               |
| <i>Asterias rubens</i>              | 1                  |                  | 88            |
| Asteroidea indet.                   | 44                 | 105              | 260 (81-458)  |
| Astropectenidae indet.              | 2                  |                  | 223 (215-232) |
| <i>Ceramaster granularis</i>        | 56                 | 196              | 202 (52-381)  |
| <i>Henricia</i> spp.                | 97                 | 521              | 216 (53-435)  |
| <i>Hippasteria phrygiana</i>        | 10                 | 27               | 221 (50-389)  |
| <i>Porania pulvillus</i>            | 6                  | 4                | 262 (188-341) |
| Poranidae indet.                    | 2                  |                  | 363 (324-403) |
| <i>Pteraster</i> sp.                |                    | 1                | 131           |
| <i>Stichastrella rosea</i>          | 3                  | 1                | 196 (87-240)  |
| Echinoidea                          |                    |                  |               |
| Echinoidea (regular) indet.         | 15                 | 2                | 157 (128-248) |
| <i>Echinus</i> sp.                  | 48                 | 84               | 223 (84-435)  |
| <i>Echinus acutus</i>               | 1                  |                  | 88            |
| Ophiuroidea                         |                    |                  |               |
| <i>Brsinga endecacnemos</i>         | 8                  |                  | 362 (278-430) |
| <i>Gorgonocephalus caputmedusae</i> | 4                  | 2                | 163 (138-215) |
| Ophiuroidea indet.                  | 63                 | 532              | 299 (87-438)  |

| Taxa                              | Field<br>sequences | N<br>(ind & col) | Depth         |
|-----------------------------------|--------------------|------------------|---------------|
| Holothuroidea                     |                    |                  |               |
| <i>Bathyplores natans</i>         | 30                 | 14               | 331 (133-431) |
| Holothuroidea indet.              | 11                 | 4                | 318 (165-416) |
| <i>Mesothuria intestinalis</i>    | 50                 | 133              | 241 (105-452) |
| <i>Parastichopus tremulus</i>     | 154                | 1057             | 241 (65-457)  |
| <i>Psolus squamatus</i>           | 105                | 938              | 233 (82-456)  |
| Chordata                          |                    |                  |               |
| Tunicata                          |                    |                  |               |
| Ascidiacea solitary               | 7                  | 11               | 228 (87-402)  |
| Ascidiacea colonial               | 5                  | 6                | 254 (133-402) |
| <i>Ciona intestinalis</i>         | 2                  |                  | 153 (87-220)  |
| Teleostei                         |                    |                  |               |
| <i>Argentina silus</i>            | 6                  |                  | 262 (132-328) |
| <i>Argentina</i> sp.              |                    | 1                | 333           |
| <i>Argentina sphyraena</i>        | 1                  |                  | 159           |
| <i>Brosme brosme</i>              | 11                 | 2                | 282 (130-424) |
| <i>Chimaera monstrosa</i>         | 54                 | 27               | 263 (113-441) |
| <i>Coryphaenoides rupestris</i>   | 3                  | 23               | 358 (322-403) |
| <i>Dipturus oxyrinchus</i>        | 1                  | 1                | 269 (207-331) |
| <i>Dipturus</i> sp.               |                    | 1                | 322           |
| <i>Etmopterus spinax</i>          | 20                 | 19               | 204 (95-402)  |
| <i>Gadiculus argenteus</i>        | 19                 |                  | 240 (88-400)  |
| Gadidae indet.                    | 2                  | 3                | 197 (147-244) |
| <i>Gadhus morhua</i>              | 1                  | 2                | 109 (124-144) |
| <i>Galeus melastomus</i>          | 19                 | 8                | 203 (129-390) |
| <i>Glyptocephalus cynoglossus</i> |                    | 1                | 344           |
| <i>Helicolenus dactylopterus</i>  | 1                  |                  | 216           |
| <i>Lepidorhombus whiffiagonis</i> | 11                 |                  | 233 (158-334) |
| <i>Lumpenus lampretaeformis</i>   | 4                  |                  | 353 (308-435) |
| <i>Lycodes</i> sp.                |                    | 2                | 252 (147-357) |
| <i>Maurolicus muelleri</i>        |                    | 19               | 307 (151-403) |
| <i>Melanogrammus aeglefinus</i>   | 1                  |                  | 84            |
| <i>Merlangius merlangus</i>       | 1                  |                  | 129           |
| <i>Micromesistius poutassou</i>   | 1                  |                  | 225           |
| <i>Microstomus kitt</i>           | 6                  |                  | 256 (131-377) |
| <i>Molva dypterygia</i>           | 7                  | 3                | 333 (156-452) |
| <i>Molva molva</i>                | 24                 | 5                | 257 (112-443) |
| <i>Molva</i> sp.                  |                    | 1                | 154           |
| Myctophidae indet.                |                    | 1                | 311           |
| <i>Myxine glutinosa</i>           | 16                 | 20               | 260 (128-334) |
| Pleuronectidae indet.             |                    | 2                | 214 (196-232) |
| Pleuronectiformes indet.          | 37                 | 44               | 215 (68-415)  |
| <i>Pollachius pollachius</i>      | 1                  |                  | 125           |
| <i>Pollachius virens</i>          | 9                  | 23               | 140 (89-161)  |

| <b>Taxa</b>                 | <b>Field<br/>sequences</b> | <b>N<br/>(ind &amp; col)</b> | <b>Depth</b>  |
|-----------------------------|----------------------------|------------------------------|---------------|
| <i>Rajella fyllae</i>       |                            | 2                            | 247 (147-347) |
| Rajidae indet.              | 14                         | 5                            | 219 (149-405) |
| <i>Sebastes</i> sp.         | 59                         | 2                            | 218 (55-291)  |
| <i>Sebastes viviparus</i>   | 1                          | 208                          | 187 (51-303)  |
| Selachii indet.             |                            | 1                            | 395           |
| <i>Solea solea</i>          | 6                          |                              | 199 (131-279) |
| Squaliformes indet.         | 6                          |                              | 256 (131-383) |
| <i>Squalus acanthias</i>    | 3                          |                              | 298 (234-403) |
| Teleostei indet.            | 19                         | 81                           | 181 (52-395)  |
| Teleostei indet. (small)    | 5                          | 6                            | 194 (63-396)  |
| <i>Trisopterus esmarkii</i> | 3                          | 2                            | 146 (133-172) |
| <i>Trisopterus minutus</i>  | 2                          |                              | 171           |
| Sum                         | 169                        | 123                          |               |
| Sum all taxa                | 195                        |                              |               |
